# Supplementary material for: Pattern of HIV testing and multiple sexual partnerships among men who have sex with men in China
Source: PubMed Central journal article supplement (PMC3840637; doi:10.1186/1471-2334-13-549), 2013-11-16
Supplement: 1471-2334-13-549-S2.pdf [file 1471-2334-13-549-S2.pdf]

**Table S1. Socio-demographic characteristic factors that associated with HIV testing among Chinese MSM, stratified by cities (a) Changsha, and (b) Tianjin.****(a) Changsha**

| <b>Characteristic</b>                   | <b>Tested within the past 12 months (N = 145; 60.9%)</b> |          | <b>Tested more than 12 months ago (N = 49; 20.6%)</b> |          | <b>Never tested (N = 44; 18.5%)</b> |          | <b>F or <math>\chi^2</math></b> | <b>P-value</b> |
|-----------------------------------------|----------------------------------------------------------|----------|-------------------------------------------------------|----------|-------------------------------------|----------|---------------------------------|----------------|
|                                         | <b>n</b>                                                 | <b>%</b> | <b>n</b>                                              | <b>%</b> | <b>n</b>                            | <b>%</b> |                                 |                |
| <b>Age (mean<math>\pm</math>SD)</b>     |                                                          |          |                                                       |          |                                     |          |                                 |                |
| <20                                     | 12                                                       | 8.3%     | 1                                                     | 2.0%     | 9                                   | 20.5%    | 14.73                           | 0.01**         |
| 20-39                                   | 110                                                      | 75.9%    | 38                                                    | 77.6%    | 34                                  | 77.3%    |                                 |                |
| $\geq$ 40                               | 21                                                       | 14.5%    | 10                                                    | 20.4%    | 1                                   | 2.3%     |                                 |                |
| Missing                                 | 2                                                        | 1.4%     | 0                                                     | 0.0%     | 0                                   | 0.0%     |                                 |                |
| <b>Marital Status</b>                   |                                                          |          |                                                       |          |                                     |          | 28.68                           | <0.001***      |
| Never married                           | 79                                                       | 54.5%    | 23                                                    | 46.9%    | 40                                  | 90.9%    |                                 |                |
| Married/cohabiting/<br>divorced/widowed | 62                                                       | 42.8%    | 26                                                    | 53.1%    | 1                                   | 2.3%     |                                 |                |
| Others/Missing                          | 4                                                        | 2.8%     | 0                                                     | 0.0%     | 3                                   | 6.8%     |                                 |                |
| <b>Residency</b>                        |                                                          |          |                                                       |          |                                     |          | 3.60                            | 0.17           |
| Local                                   | 59                                                       | 40.7%    | 13                                                    | 26.5%    | 17                                  | 38.6%    |                                 |                |
| Non-local                               | 80                                                       | 55.2%    | 35                                                    | 71.4%    | 25                                  | 56.8%    |                                 |                |
| Missing                                 | 6                                                        | 4.1%     | 1                                                     | 2.0%     | 2                                   | 4.5%     |                                 |                |
| <b>Education Level</b>                  |                                                          |          |                                                       |          |                                     |          | 3.66                            | 0.45           |
| Junior high & lower                     | 7                                                        | 4.8%     | 0                                                     | 0.0%     | 2                                   | 4.5%     |                                 |                |
| Senior high                             | 30                                                       | 20.7%    | 10                                                    | 20.4%    | 12                                  | 27.3%    |                                 |                |
| College & above                         | 108                                                      | 74.5%    | 39                                                    | 79.6%    | 29                                  | 65.9%    |                                 |                |
| Missing                                 | 0                                                        | 0.0%     | 0                                                     | 0.0%     | 1                                   | 2.3%     |                                 |                |
| <b>Occupation</b>                       |                                                          |          |                                                       |          |                                     |          | 21.50                           | <0.001***      |
| Student/others                          | 74                                                       | 51.0%    | 16                                                    | 11.0%    | 34                                  | 23.4%    |                                 |                |
| Employed                                | 71                                                       | 49.0%    | 33                                                    | 22.8%    | 8                                   | 5.5%     |                                 |                |
| Missing                                 | 0                                                        | 0.0%     | 0                                                     | 0.0%     | 2                                   | 4.5%     |                                 |                |
| <b>Self-identified sexual identity</b>  |                                                          |          |                                                       |          |                                     |          | 0.71                            | 0.70           |
| Homosexual                              | 126                                                      | 86.9%    | 42                                                    | 29.0%    | 33                                  | 22.8%    |                                 |                |
| Heterosexual/Bisexual                   | 17                                                       | 11.7%    | 7                                                     | 4.8%     | 3                                   | 2.1%     |                                 |                |
| Unsure/Missing                          | 2                                                        | 1.4%     | 0                                                     | 0.0%     | 8                                   | 5.5%     |                                 |                |

**(b) Tianjin**

| <b>Characteristic</b>                   | <b>Tested within the past 12 months (N = 117; 56.0%)</b> |       | <b>Tested more than 12 months ago (N = 46; 22.0%)</b> |       | <b>Never tested (N = 46; 22.0%)</b> |       | <b>F or <math>\chi^2</math></b> | <b>P-value</b> |
|-----------------------------------------|----------------------------------------------------------|-------|-------------------------------------------------------|-------|-------------------------------------|-------|---------------------------------|----------------|
|                                         | <i>n</i>                                                 | %     | <i>n</i>                                              | %     | <i>n</i>                            | %     |                                 |                |
| <b>Age (mean±SD)</b>                    |                                                          |       |                                                       |       |                                     |       |                                 |                |
| <20                                     | 4                                                        | 3.4%  | 0                                                     | 0.0%  | 4                                   | 8.7%  | 10.62                           | 0.03*          |
| 20-39                                   | 104                                                      | 88.9% | 42                                                    | 91.3% | 33                                  | 71.7% |                                 |                |
| ≥40                                     | 9                                                        | 7.7%  | 4                                                     | 8.7%  | 9                                   | 19.6% |                                 |                |
| Missing                                 | 0                                                        | 0.0%  | 0                                                     | 0.0%  | 0                                   | 0.0%  |                                 |                |
| <b>Marital Status</b>                   |                                                          |       |                                                       |       |                                     |       | 1.19                            | 0.55           |
| Never married                           | 84                                                       | 71.8% | 29                                                    | 63.0% | 32                                  | 69.6% |                                 |                |
| Married/cohabiting/<br>divorced/widowed | 33                                                       | 28.2% | 17                                                    | 37.0% | 14                                  | 30.4% |                                 |                |
| Others/Missing                          | 0                                                        | 0.0%  | 0                                                     | 0.0%  | 0                                   | 0.0%  |                                 |                |
| <b>Residency</b>                        |                                                          |       |                                                       |       |                                     |       | 6.61                            | 0.05*          |
| Local                                   | 63                                                       | 53.8% | 30                                                    | 65.2% | 34                                  | 73.9% |                                 |                |
| Non-local                               | 54                                                       | 46.2% | 16                                                    | 34.8% | 12                                  | 26.1% |                                 |                |
| Missing                                 | 0                                                        | 0.0%  | 0                                                     | 0.0%  | 0                                   | 0.0%  |                                 |                |
| <b>Education Level</b>                  |                                                          |       |                                                       |       |                                     |       | 4.88                            | 0.30           |
| Junior high & lower                     | 17                                                       | 14.5% | 4                                                     | 8.7%  | 2                                   | 4.3%  |                                 |                |
| Senior high                             | 46                                                       | 39.3% | 23                                                    | 50.0% | 20                                  | 43.5% |                                 |                |
| College & above                         | 54                                                       | 46.2% | 19                                                    | 41.3% | 24                                  | 52.2% |                                 |                |
| Missing                                 | 0                                                        | 0.0%  | 0                                                     | 0.0%  | 0                                   | 0.0%  |                                 |                |
| <b>Occupation</b>                       |                                                          |       |                                                       |       |                                     |       | 5.98                            | 0.05*          |
| Student/others                          | 69                                                       | 59.0% | 18                                                    | 39.1% | 23                                  | 50.0% |                                 |                |
| Employed                                | 46                                                       | 39.3% | 28                                                    | 60.9% | 23                                  | 50.0% |                                 |                |
| Missing                                 | 2                                                        | 1.7%  | 0                                                     | 0.0%  | 0                                   | 0.0%  |                                 |                |
| <b>Self-identified sexual identity</b>  |                                                          |       |                                                       |       |                                     |       | 0.99                            | 0.61           |
| Homosexual                              | 87                                                       | 74.4% | 31                                                    | 67.4% | 34                                  | 73.9% |                                 |                |
| Heterosexual/Bisexual                   | 29                                                       | 24.8% | 15                                                    | 32.6% | 12                                  | 26.1% |                                 |                |
| Unsure/Missing                          | 1                                                        | 0.9%  | 0                                                     | 0.0%  | 0                                   | 0.0%  |                                 |                |

Note: \* $p < 0.05$ , \*\*  $p < 0.01$  and \*\*\*  $p < 0.001$ .
